# Supplementary material for: Complementary microscopic and metabarcoding (Illumina, Oxford Nanopore) studies allow for a better understanding of the microbiome pattern of leafhopper species Iassus lanio (Cicadellidae, Hemiptera)
Source: Research Square preprint supplement (doi:10.21203/rs.3.rs-8816862/v1), 2026-02-16
Supplement: Supplementary file 1 [file f5ebf331b97659aa4bc94867.docx]

Table S1. List of samples used for microbiome studies

| Sample name | Species | Purpose | Solution | Country | Location | GPS | Collection date | Plant | Trophic specialty |
| --- | --- | --- | --- | --- | --- | --- | --- | --- | --- |
| Ias_lan_1 | *Iassus lanio* | 16S rDNA sequencing | Absolute ethanol | Poland | Częstochowa Dźbów | 50°46'30.8"N 19°04'08.9"E | 14.07.2023 | *Quercus* | monophagous |
| Ias_lan_2 | *Iassus lanio* | 16S rDNA sequencing | Absolute ethanol | Poland | Częstochowa Łąkowa | 50°46'36.9"N 19°01'13.9"E | 18.07.2023 | *Quercus* | monophagous |
| Ias_lan_3 | *Iassus lanio* | 16S rDNA sequencing | Absolute ethanol | Poland | Strzebiń | 50°36'24.6"N 18°55'55.8"E | 27.07.2023 | *Quercus* | monophagous |
| Ias_lan_4 | *Iassus lanio* | 16S rDNA sequencing | Absolute ethanol | Poland | Strzebiń | 50°36'24.6"N 18°55'55.8"E | 27.07.2023 | *Quercus* | monophagous |
| Ias_lan_5 | *Iassus lanio* | 16S rDNA sequencing | Absolute ethanol | Czech Republic | Kurdejov | 48°57'50.6"N 16°46'19.0"E | 25.06.2023 | *Quercus* | monophagous |
| Ias_lan_6 | *Iassus lanio* | FISH  Confocal | Absolute ethanol | Poland | Strzebiń | 50°36'24.6"N 18°55'55.8"E | 27.07.2023 | *Quercus* | monophagous |
| Ias_lan_7 | *Iassus lanio* | FISH  Confocal | Absolute ethanol | Poland | Puszczew | 50°47'49.8"N 18°51'35.1"E | 10.08.2023 | *Quercus* | monophagous |
| Ias_lan_8 | *Iassus lanio* | TEM | Glutaraldehyde 2.5% | Poland | Częstochowa Lisieniec | 50°48'38.6"N 19°04'08.0"E | 07.07.2023 | *Quercus* | monophagous |
| Ias_lan_9 | *Iassus lanio* | TEM | Glutaraldehyde 2.5% | Poland | Częstochowa Łąkowa | 50°46'36.9"N 19°01'13.9"E | 18.07.2023 | *Quercus* | monophagous |
| Ias_lan_10 | *Iassus lanio* | TEM | Glutaraldehyde 2.5% | Poland | Puszczew | 50°47'49.8"N 18°51'35.1"E | 12.08.2023 | *Quercus* | monophagous |

Table S2. Used primers, including purpose, name, sequence, target gene, annealing temperature and source; PCR reactions conditions

| **Purpose** | **Primer name** | **Primer sequence (5’-3’)** | **Target gene** | **Annealing temperature** | **Source** |
| --- | --- | --- | --- | --- | --- |
| Diagnostic PCR | F357 | CCTACGGGnGGCwGCAG | Bacterial 16S rRNA gene, region V3-V4 | 50°C | (1) |
| R805 | GACTAChvGGGTATCTAATCC |
| NS1 | GTAGTCATATGCTTGTCTC | Fungal 18S rRNA gene | 54°C | (2) |
| FS2 | TAGGnATTCCTCGTTGAAGA |
| Sequencing PCR | F357 | CCTACGGGnGGCwGCAG | Bacterial 16S rRNA gene, region V3-V4 | 50°C | (1) |
| R805 | GACTAChvGGGTATCTAATCC |
| Euk_ITS1F | GGTCATTTAGAGGAAGTAA | Fungal ITS1, ITS2 | 50°C | (3) |
| Euk_ITS4R | TCCTCCGCTTATTGATATGC |
| COI F | CCHGAYATRGCHTTYCCHCG | mitochondrial Cytochrome c Oxidase subunit I | 48-54°C | (4) |
| COI R | TCDGGRTGNCCRAARAAYCA |
| FISH | Card_Iassus | Cy5-GCGGGGGTTCTTGAGAGTAC | 16S rRNA gene of *Cardinium* symbiont | Not applicable | This work |
| HYP760 | Cy5-CCTGCCTGGAGCACTCT | 18S rRNA gene of Ophiocordycipitaceae fungi | Not applicable | (5) |
| Sod1248R | Fitc-TCCGCTGACTCTCGGGAGAT | 16S rRNA gene of *Sodalis*-like symbionts | Not applicable | (6) |
| Sul664R | Cy3-CCMCACATTCCAGYTACTCC | 16S rRNA gene of *Karelsulcia muelleri* | Not applicable | (6) |

The PCR reactions were performed in a mixture consisting of 10 μl of the PCR High GC Mix Plus reagent with Taq DNA polymerase (A&A Biotechnology), 8 μl of pure water, 0,5 μl of each of the primers (10 μM) and 1 μl of the DNA template (1 μg/μl) under the following conditions: an initial denaturation step at 94 oC for a duration of 3 min, followed by 33 cycles at 94 oC for 30s, annealing temperature for 40 s, 70 oC for 1 min 40 s and a final extension step of 5 min at 72 oC. The PCR products were made visible through electrophoresis in 1.5% agarose gel stained with Simply Safe (EURx). PCR products cleaning was performed according to protocol using the Clean Up Concentrator Kit (A&A Biotechnology).

**References**

1. Thijs S, De Beeck MO, Beckers B, Truyens S, Stevens V, Van Hamme JD, Weyens N, Vangronsveld J. 2017. Comparative evaluation of four bacteria-specific primer pairs for 16S rRNA gene surveys. Front Microbiol 8:251189.

2. White TJ, Bruns T, Lee S, Taylor J. 1990. Amplification and direct sequencing of fungal ribosomal RNA genes for phylogenetics. PCR Protocols 315–322.

3. GARDES M, BRUNS TD. 1993. ITS primers with enhanced specificity for basidiomycetes--application to the identification of mycorrhizae and rusts. Mol Ecol 2:113–118.

4. Elbrecht V, Braukmann TWA, Ivanova N V., Prosser SWJ, Hajibabaei M, Wright M, Zakharov E V., Hebert PDN, Steinke D. 2019. Validation of COI metabarcoding primers for terrestrial arthropods. PeerJ 2019:e7745.

5. Matsuura Y, Moriyama M, Łukasik P, Vanderpool D, Tanahashi M, Meng XY, McCutcheon JP, Fukatsu T. 2018. Recurrent symbiont recruitment from fungal parasites in cicadas. Proc Natl Acad Sci U S A 115:E5970–E5979.

6. Koga R, Bennett GM, Cryan JR, Moran NA. 2013. Evolutionary replacement of obligate symbionts in an ancient and diverse insect lineage. Environ Microbiol 15:2073–2081.
